# Supplementary material for: Encoding of frequency-modulation (FM) rates in human auditory cortex
Source: PubMed Central journal article supplement (PMC4677350; doi:10.1038/srep18143), 2015-12-14
Supplement: srep18143-s1.pdf [file srep18143-s1.pdf]

# **Encoding of frequency-modulation (FM) rates in human auditory cortex**

Hidehiko Okamoto, Ryusuke Kakigi

## **Supplementary Material File Names**

S1. Example for FM\_01.wav

S2. Example for FM\_04.wav

S3. Example for FM\_16.wav

S4. Example for FM\_64.wav

## **Supplementary Material Legends**

SI 1. An exemplary sound representing FM\_01 as shown in Figures 1 and 2.

SI 2. An exemplary sound representing FM\_04 as shown in Figures 1 and 2.

SI 3. An exemplary sound representing FM\_16 as shown in Figures 1 and 2.

SI 4. An exemplary sound representing FM\_64 as shown in Figures 1 and 2.
